# Supplementary material for: Individual and joint effects of trehalose and glutamate on diabetic retinopathy: a propensity score-matched case–control study
Source: PubMed Central journal article supplement — Endocr Connect. 2022 Jan 14;11(2):e210474. doi: 10.1530/EC-21-0474 (PMC8859951; doi:10.1530/ec-21-0474), 2022-01-14
Supplement: supplementary_table_1.pdf [file supplementary_table_1.pdf]

Table S1. Individual and joint effect of trehalose and glutamate on the odds of diabetic retinopathy before missing value filling.

| Metabolites > median  | Model 1           |        | Model 2            |        | Model 3             |        |
|-----------------------|-------------------|--------|--------------------|--------|---------------------|--------|
|                       | OR (95%CI)        | P      | OR (95%CI)         | P      | OR (95%CI)          | P      |
| Trehalose             |                   |        |                    |        |                     |        |
| Per IQR               | 0.41(0.26,0.65)   | <0.001 | 0.33(0.19,0.59)    | <0.001 | 0.11(0.04,0.31)     | <0.001 |
| Quartiles             |                   |        |                    |        |                     |        |
| Q <sub>1</sub>        | 1.00(1.00,1.00)   | Ref.   | 1.00(1.00,1.00)    | Ref.   | 1.00(1.00,1.00)     | Ref.   |
| Q <sub>2</sub>        | 0.57(0.21,1.51)   | 0.257  | 0.26(0.07,0.91)    | 0.035  | 0.09(0.02,0.59)     | 0.012  |
| Q <sub>3</sub>        | 0.72(0.27,1.92)   | 0.509  | 0.42(0.12,1.42)    | 0.162  | 0.06(0.01,0.41)     | 0.004  |
| Q <sub>4</sub>        | 0.10(0.03,0.32)   | <0.001 | 0.04(0.01,0.19)    | <0.001 | 0.01(0.00,0.03)     | <0.001 |
| P for trend           |                   | <0.001 |                    | <0.001 |                     | <0.001 |
| Glutamate             |                   |        |                    |        |                     |        |
| Per IQR               | 1.62(1.15,2.30)   | 0.006  | 1.66(1.11,2.48)    | 0.014  | 1.98(1.21,3.24)     | 0.006  |
| Quartiles             |                   |        |                    |        |                     |        |
| Q <sub>1</sub>        | 1.00(1.00,1.00)   | Ref.   | 1.00(1.00,1.00)    | Ref.   | 1.00(1.00,1.00)     | Ref.   |
| Q <sub>2</sub>        | 1.76(0.66,4.69)   | 0.257  | 1.28(0.40,4.11)    | 0.684  | 1.30(0.33,5.16)     | 0.705  |
| Q <sub>3</sub>        | 3.14(1.17,8.41)   | 0.023  | 2.13(0.68,6.66)    | 0.193  | 2.64(0.65,10.75)    | 0.174  |
| Q <sub>4</sub>        | 3.38(1.25,9.16)   | 0.017  | 3.66(1.09,12.33)   | 0.036  | 5.57(1.31,23.75)    | 0.020  |
| P for trend           |                   | 0.008  |                    | 0.023  |                     | 0.010  |
| Trehalose Glutamate   |                   |        |                    |        |                     |        |
| Yes No                | 1.00(1.00,1.00)   | Ref.   | 1.00(1.00,1.00)    | Ref.   | 1.00(1.00,1.00)     | Ref.   |
| No No                 | 0.89(0.34,2.35)   | 0.813  | 0.82(0.25,2.65)    | 0.738  | 1.75(0.37,8.20)     | 0.480  |
| Yes Yes               | 0.89(0.34,2.35)   | 0.813  | 0.73(0.23,2.29)    | 0.590  | 0.76(0.20,2.88)     | 0.689  |
| No Yes                | 10.23(2.89,36.18) | <0.001 | 10.04(2.52,40.05)  | 0.001  | 29.85(5.19,171.89)  | <0.001 |
| Interaction           | 12.93(2.68,62.40) | 0.001  | 16.82(2.69,105.26) | 0.003  | 22.43(2.45,205.04)  | 0.006  |
| (Trehalose*Glutamate) |                   |        |                    |        |                     |        |
| RERI (95% CI)         | 9.45(-2.84,21.74) |        | 9.49(-3.74,22.73)  |        | 28.35(-22.49,79.18) |        |

Abbreviation: IQR, interquartile range; Q<sub>1</sub>, the first quartile; Q<sub>2</sub>, the second quartile; Q<sub>3</sub>, the third quartile; Q<sub>4</sub>, the fourth quartile; RERI, relative excess risk of interaction; OR, odds ratio.

Model 1 was unadjusted.

Model 2 was adjusted for SBP and duration of diabetes.

Model 3 was adjusted for the confounders chosen by LASSO regression, including TG, SBP, DBP, duration of diabetes, residence, degree of education, smoking status, history of hypertension, ITIADM and therapy or not.
