# Supplementary material for: Individual and joint effects of trehalose and glutamate on diabetic retinopathy: a propensity score-matched case–control study
Source: PubMed Central journal article supplement — Endocr Connect. 2022 Jan 14;11(2):e210474. doi: 10.1530/EC-21-0474 (PMC8859951; doi:10.1530/ec-21-0474), 2022-01-14
Supplement: supplementary_table_2.pdf [file supplementary_table_2.pdf]

Table S2. Individual and joint effect of trehalose and glutamate on the odds of diabetic retinopathy after adjusting the effects of dietary favor.

| Metabolites > median              | Model 2 <sup>a</sup> |                    | Model 3 <sup>b</sup> |                      |        |
|-----------------------------------|----------------------|--------------------|----------------------|----------------------|--------|
|                                   | OR (95%CI)           | P                  | OR (95%CI)           | P                    |        |
| Trehalose                         |                      |                    |                      |                      |        |
| Per IQR                           | 0.39(0.23,0.66)      | <0.001             | 0.13(0.05,0.33)      | <0.001               |        |
| Quartiles                         |                      |                    |                      |                      |        |
| Q <sub>1</sub>                    | 1.00(1.00,1.00)      | Ref.               | 1.00(1.00,1.00)      | Ref.                 |        |
| Q <sub>2</sub>                    | 0.44(0.15,1.32)      | 0.142              | 0.17(0.04,0.77)      | 0.021                |        |
| Q <sub>3</sub>                    | 0.62(0.20,1.87)      | 0.394              | 0.12(0.02,0.60)      | 0.010                |        |
| Q <sub>4</sub>                    | 0.08(0.02,0.30)      | <0.001             | 0.01(0.00,0.05)      | <0.001               |        |
| P for trend                       |                      | 0.001              |                      | <0.001               |        |
| Glutamate                         |                      |                    |                      |                      |        |
| Per IQR                           | 1.90(1.26,2.87)      | 0.002              | 2.40(1.43,4.04)      | 0.001                |        |
| Quartiles                         |                      |                    |                      |                      |        |
| Q <sub>1</sub>                    | 1.00(1.00,1.00)      | Ref.               | 1.00(1.00,1.00)      | Ref.                 |        |
| Q <sub>2</sub>                    | 0.98(0.30,3.14)      | 0.966              | 0.74(0.19,2.97)      | 0.675                |        |
| Q <sub>3</sub>                    | 3.21(1.07,9.61)      | 0.037              | 2.98(0.71,12.48)     | 0.135                |        |
| Q <sub>4</sub>                    | 4.85(1.49,15.73)     | 0.009              | 8.49(1.99,36.32)     | 0.004                |        |
| P for trend                       |                      | 0.002              |                      | 0.001                |        |
| Trehalose                         | Glutamate            |                    |                      |                      |        |
| Yes                               | No                   | 1.00(1.00,1.00)    | Ref.                 | 1.00(1.00,1.00)      | Ref.   |
| No                                | No                   | 0.58(0.17,1.98)    | 0.384                | 1.06(0.22,5.11)      | 0.939  |
| Yes                               | Yes                  | 0.98(0.31,3.08)    | 0.966                | 1.06(0.26,4.24)      | 0.937  |
| No                                | Yes                  | 13.94(3.44,56.46)  | <0.001               | 46.24(7.78,274.77)   | <0.001 |
| Interaction (Trehalose*Glutamate) |                      | 24.69(3.95,154.38) | 0.001                | 41.11(4.12,410.72)   | 0.002  |
| RERI (95% CI)                     |                      | 10.90(-3.66,25.45) |                      | 45.11(-36.11,126.35) |        |

Abbreviation: IQR, interquartile range; Q<sub>1</sub>, the first quartile; Q<sub>2</sub>, the second quartile; Q<sub>3</sub>, the third quartile; Q<sub>4</sub>, the fourth quartile; RERI, relative excess risk of interaction; OR, odds ratio.

<sup>a</sup> Model 2 was adjusted for SBP, duration of diabetes, and dietary favor variables (prefer high salt diet or not, prefer high oil diet or not, and prefer pickled food or not).

<sup>b</sup> Model 3 was adjusted for the confounders chosen by LASSO regression plus dietary favor variables.
