# Supplementary material for: Individual and joint effects of trehalose and glutamate on diabetic retinopathy: a propensity score-matched case–control study
Source: PubMed Central journal article supplement — Endocr Connect. 2022 Jan 14;11(2):e210474. doi: 10.1530/EC-21-0474 (PMC8859951; doi:10.1530/ec-21-0474), 2022-01-14
Supplement: supplementary_table_3.pdf [file supplementary_table_3.pdf]

Table S3. Individual and joint effect of trehalose and glutamate on the odds of diabetic retinopathy in non-proliferative diabetic retinopathy patient pairs.

| Metabolites > median              | Model 1 <sup>a</sup> |        | Model 2 <sup>b</sup> |        | Model 3 <sup>c</sup> |        |
|-----------------------------------|----------------------|--------|----------------------|--------|----------------------|--------|
|                                   | OR (95%CI)           | P      | OR (95%CI)           | P      | OR (95%CI)           | P      |
| Trehalose                         |                      |        |                      |        |                      |        |
| Per IQR                           | 0.45(0.27,0.74)      | 0.002  | 0.45(0.27,0.75)      | 0.002  | 0.24(0.11,0.51)      | <0.001 |
| Quartiles                         |                      |        |                      |        |                      |        |
| Q <sub>1</sub>                    | 1.00(1.00,1.00)      | Ref.   | 1.00(1.00,1.00)      | Ref.   | 1.00(1.00,1.00)      | Ref.   |
| Q <sub>2</sub>                    | 0.49(0.17,1.41)      | 0.187  | 0.41(0.13,1.28)      | 0.125  | 0.19(0.04,0.87)      | 0.033  |
| Q <sub>3</sub>                    | 0.56(0.19,1.62)      | 0.286  | 0.55(0.18,1.65)      | 0.286  | 0.10(0.02,0.52)      | 0.006  |
| Q <sub>4</sub>                    | 0.11(0.03,0.35)      | <0.001 | 0.10(0.03,0.35)      | <0.001 | 0.01(0.00,0.07)      | <0.001 |
| P for trend                       |                      | 0.001  |                      | 0.001  |                      | <0.001 |
| Glutamate                         |                      |        |                      |        |                      |        |
| Per IQR                           | 1.58(1.08,2.30)      | 0.018  | 1.68(1.12,2.51)      | 0.012  | 2.03(1.23,3.35)      | 0.006  |
| Quartiles                         |                      |        |                      |        |                      |        |
| Q <sub>1</sub>                    | 1.00(1.00,1.00)      | Ref.   | 1.00(1.00,1.00)      | Ref.   | 1.00(1.00,1.00)      | Ref.   |
| Q <sub>2</sub>                    | 1.75(0.62,4.97)      | 0.294  | 1.89(0.62,5.79)      | 0.266  | 2.01(0.53,7.54)      | 0.303  |
| Q <sub>3</sub>                    | 2.62(0.92,7.46)      | 0.072  | 2.53(0.82,7.78)      | 0.106  | 2.45(0.61,9.78)      | 0.205  |
| Q <sub>4</sub>                    | 3.46(1.20,9.99)      | 0.022  | 4.75(1.50,15.09)     | 0.008  | 8.10(1.92,34.22)     | 0.004  |
| P for trend                       |                      | 0.016  |                      | 0.007  |                      | 0.004  |
| Trehalose Glutamate               |                      |        |                      |        |                      |        |
| Yes No                            | 1.00(1.00,1.00)      | Ref.   | 1.00(1.00,1.00)      | Ref.   | 1.00(1.00,1.00)      | Ref.   |
| No No                             | 0.90(0.32,2.52)      | 0.833  | 0.75(0.25,2.28)      | 0.608  | 1.44(0.34,6.03)      | 0.621  |
| Yes Yes                           | 0.78(0.28,2.21)      | 0.639  | 0.73(0.24,2.23)      | 0.585  | 0.50(0.13,1.89)      | 0.309  |
| No Yes                            | 8.85(2.44,32.12)     | 0.001  | 9.63(2.51,37.02)     | 0.001  | 32.40(5.46,192.35)   | <0.001 |
| Interaction (Trehalose*Glutamate) |                      |        |                      |        |                      |        |
| RERI (95% CI)                     | 8.18(-2.60,18.96)    |        | 9.15(-3.21,21.51)    |        | 31.46(-25.26,88.18)  |        |

Abbreviation: IQR, interquartile range; Q<sub>1</sub>, the first quartile; Q<sub>2</sub>, the second quartile; Q<sub>3</sub>, the third quartile; Q<sub>4</sub>, the fourth quartile; RERI, relative excess risk of interaction; OR, odds ratio.

<sup>a</sup> Model 1 was unadjusted.

<sup>b</sup> Model 2 was adjusted for SBP and duration of diabetes.

<sup>c</sup> Model 3 was adjusted for the confounders chosen by LASSO regression.
