# Supplementary material for: Individual and joint effects of trehalose and glutamate on diabetic retinopathy: a propensity score-matched case–control study
Source: PubMed Central journal article supplement — Endocr Connect. 2022 Jan 14;11(2):e210474. doi: 10.1530/EC-21-0474 (PMC8859951; doi:10.1530/ec-21-0474), 2022-01-14
Supplement: supplementary_table_4.pdf [file supplementary_table_4.pdf]

Table S4. Individual and joint effect of trehalose and glutamate on the odds of diabetic retinopathy after taking health controls as reference.

| Metabolites > median              | Model 1 <sup>a</sup> |        | Model 2 <sup>b</sup> |        | Model 3 <sup>c</sup> |       |
|-----------------------------------|----------------------|--------|----------------------|--------|----------------------|-------|
|                                   | OR (95%CI)           | P      | OR (95%CI)           | P      | OR (95%CI)           | P     |
| Trehalose                         |                      |        |                      |        |                      |       |
| Per IQR                           | 0.61(0.43,0.88)      | 0.009  | 0.60(0.40,0.90)      | 0.013  | 0.42(0.16,1.11)      | 0.079 |
| Quartiles                         |                      |        |                      |        |                      |       |
| Q <sub>1</sub>                    | 1.00(1.00,1.00)      | Ref.   | 1.00(1.00,1.00)      | Ref.   | 1.00(1.00,1.00)      | Ref.  |
| Q <sub>2</sub>                    | 0.21(0.07,0.58)      | 0.003  | 0.12(0.04,0.41)      | 0.001  | 0.05(0.00,1.48)      | 0.082 |
| Q <sub>3</sub>                    | 0.29(0.10,0.82)      | 0.019  | 0.27(0.08,0.90)      | 0.032  | 0.08(0.00,3.62)      | 0.191 |
| Q <sub>4</sub>                    | 0.17(0.06,0.48)      | 0.001  | 0.13(0.04,0.44)      | 0.001  | 0.07(0.00,1.56)      | 0.093 |
| P for trend                       |                      | 0.003  |                      | 0.006  |                      | 0.139 |
| Glutamate                         |                      |        |                      |        |                      |       |
| Per IQR                           | 3.52(1.98,6.26)      | <0.001 | 5.70(2.74,11.85)     | <0.001 | 13.02(0.86,196.95)   | 0.064 |
| Quartiles                         |                      |        |                      |        |                      |       |
| Q <sub>1</sub>                    | 1.00(1.00,1.00)      | Ref.   | 1.00(1.00,1.00)      | Ref.   | 1.00(1.00,1.00)      | Ref.  |
| Q <sub>2</sub>                    | 1.10(0.39,3.07)      | 0.856  | 1.33(0.43,4.09)      | 0.623  | 1.80(0.05,60.86)     | 0.743 |
| Q <sub>3</sub>                    | 3.20(1.18,8.67)      | 0.022  | 4.83(1.52,15.32)     | 0.008  | 15.82(0.42,602.63)   | 0.137 |
| Q <sub>4</sub>                    | 11.20(3.55,35.36)    | <0.001 | 25.55(6.24,104.59)   | <0.001 | 47.83(1.01,2263.78)  | 0.049 |
| P for trend                       |                      | <0.001 |                      | <0.001 |                      | 0.035 |
| Trehalose Glutamate               |                      |        |                      |        |                      |       |
| Yes No                            | 1.00(1.00,1.00)      | Ref.   | 1.00(1.00,1.00)      | Ref.   | 1.00(1.00,1.00)      | Ref.  |
| No No                             | 1.03(0.36,2.95)      | 0.963  | 0.87(0.28,2.70)      | 0.808  | 1.33(0.05,34.38)     | 0.862 |
| Yes Yes                           | 3.69(1.33,10.28)     | 0.012  | 6.84(2.01,23.24)     | 0.002  | 9.05(0.15,552.85)    | 0.294 |
| No Yes                            | 6.71(2.61,17.27)     | <0.001 | 9.12(3.03,27.40)     | <0.001 | 30.15(0.97,934.31)   | 0.052 |
| Interaction (Trehalose*Glutamate) |                      |        |                      |        |                      |       |
| RERI (95% CI)                     | 3.00(-2.67,8.66)     |        | 2.41(-7.51,12.32)    |        | 20.76(-64.75,106.28) |       |

Abbreviation: IQR, interquartile range; Q<sub>1</sub>, the first quartile; Q<sub>2</sub>, the second quartile; Q<sub>3</sub>, the third quartile; Q<sub>4</sub>, the fourth quartile; RERI, relative excess risk of interaction; OR, odds ratio.

<sup>a</sup> Model 1 was unadjusted.

<sup>b</sup> Model 2 was adjusted for SBP, TC and TG.

<sup>c</sup> Model 3 was adjusted for SBP, TC, TG and HbA<sub>1c</sub>.
