# Supplementary figures and images for: Individual and joint effects of trehalose and glutamate on diabetic retinopathy: a propensity score-matched case–control study
Source: PubMed Central journal article supplement — Endocr Connect. 2022 Jan 14;11(2):e210474. doi: 10.1530/EC-21-0474 (PMC8859951; doi:10.1530/ec-21-0474), 2022-01-14

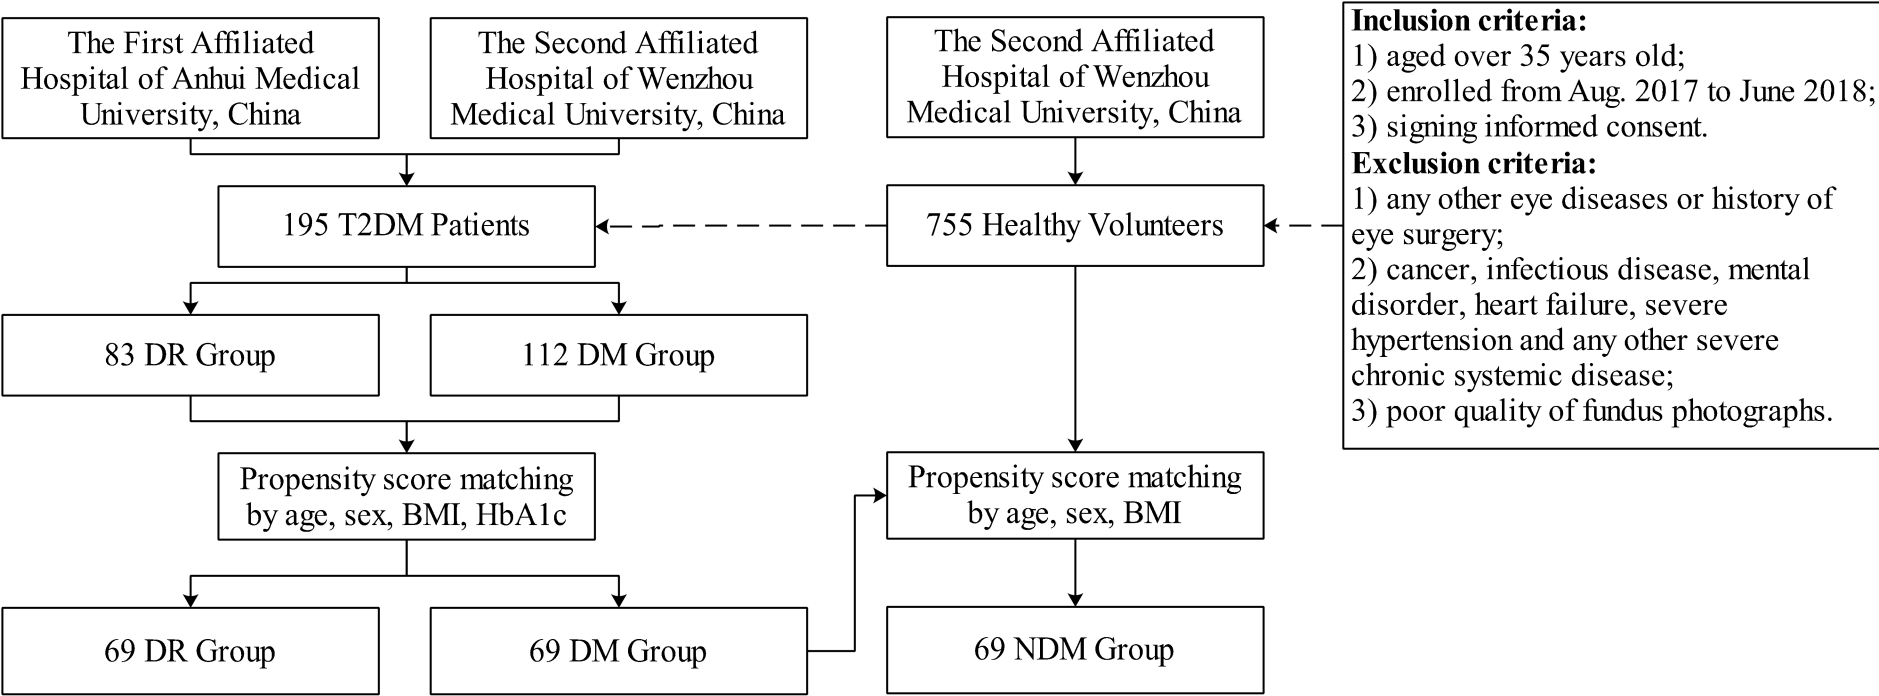

Supplement: supplementary_figure_1.pdf [file supplementary_figure_1.pdf]

**A**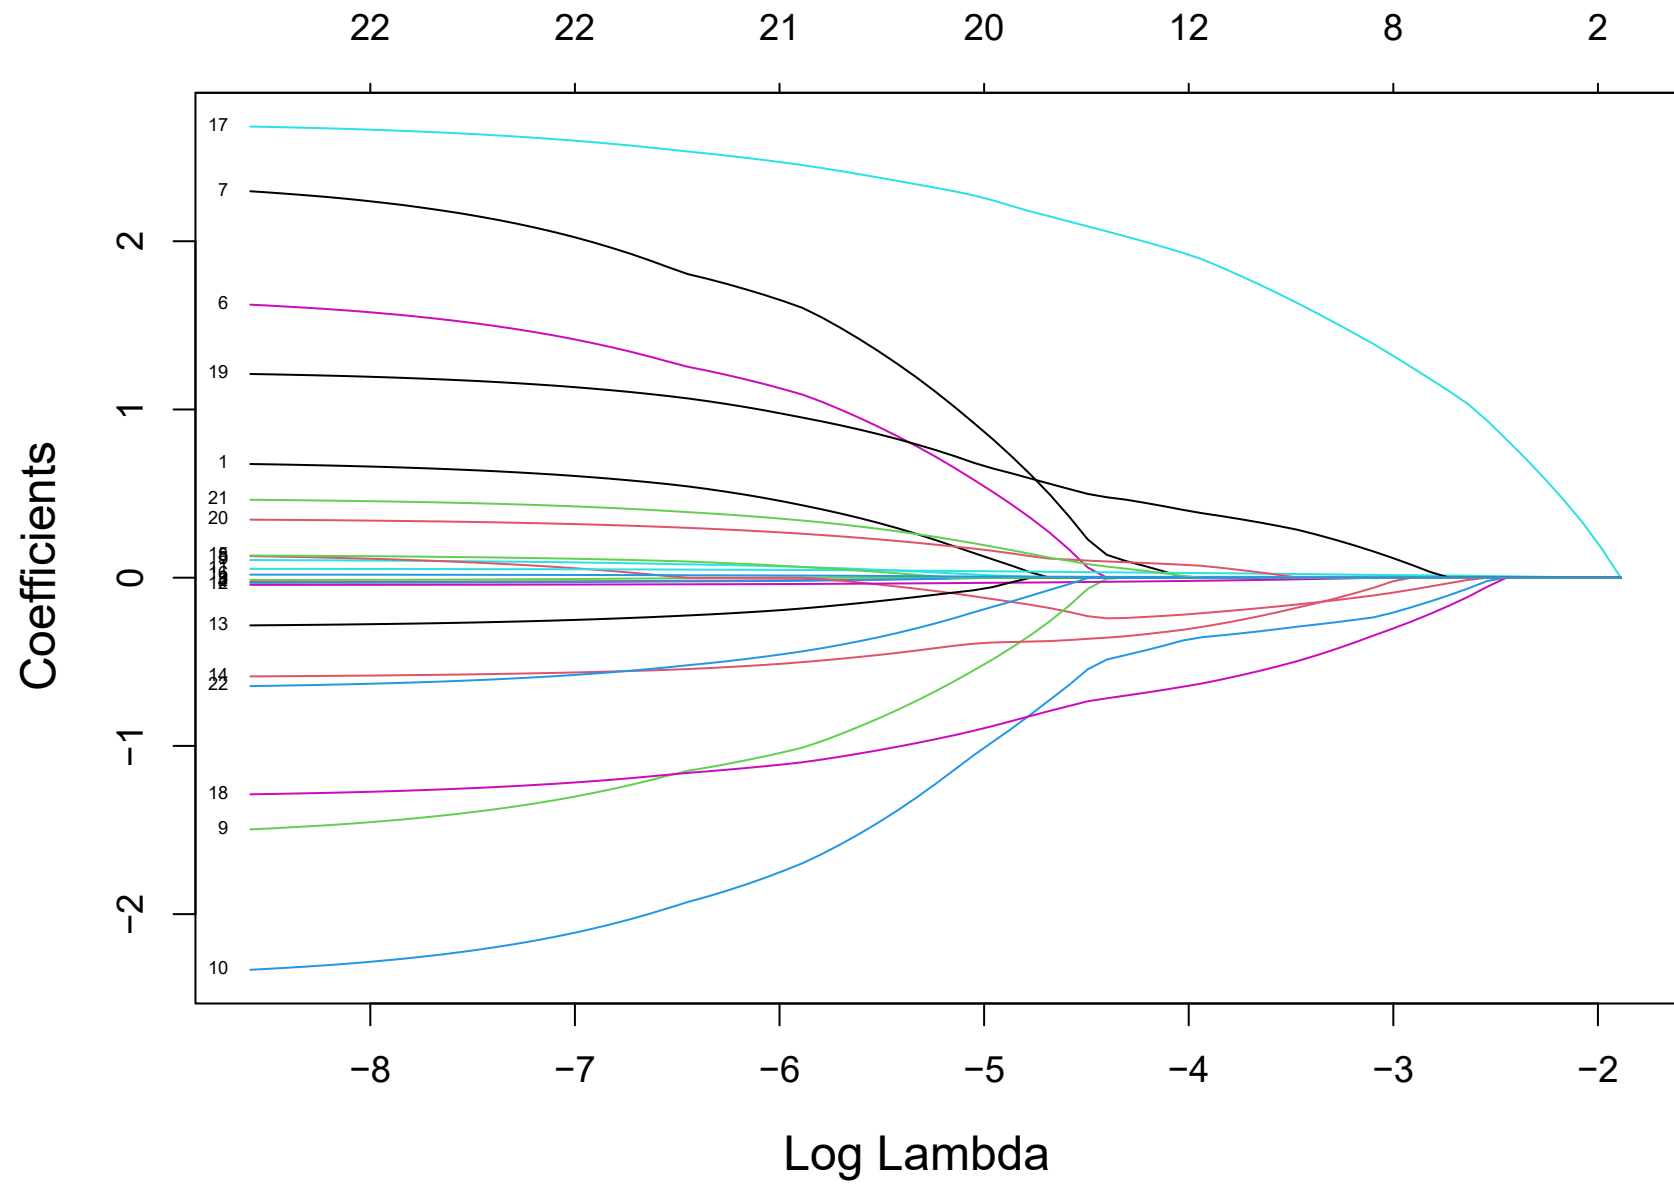**B**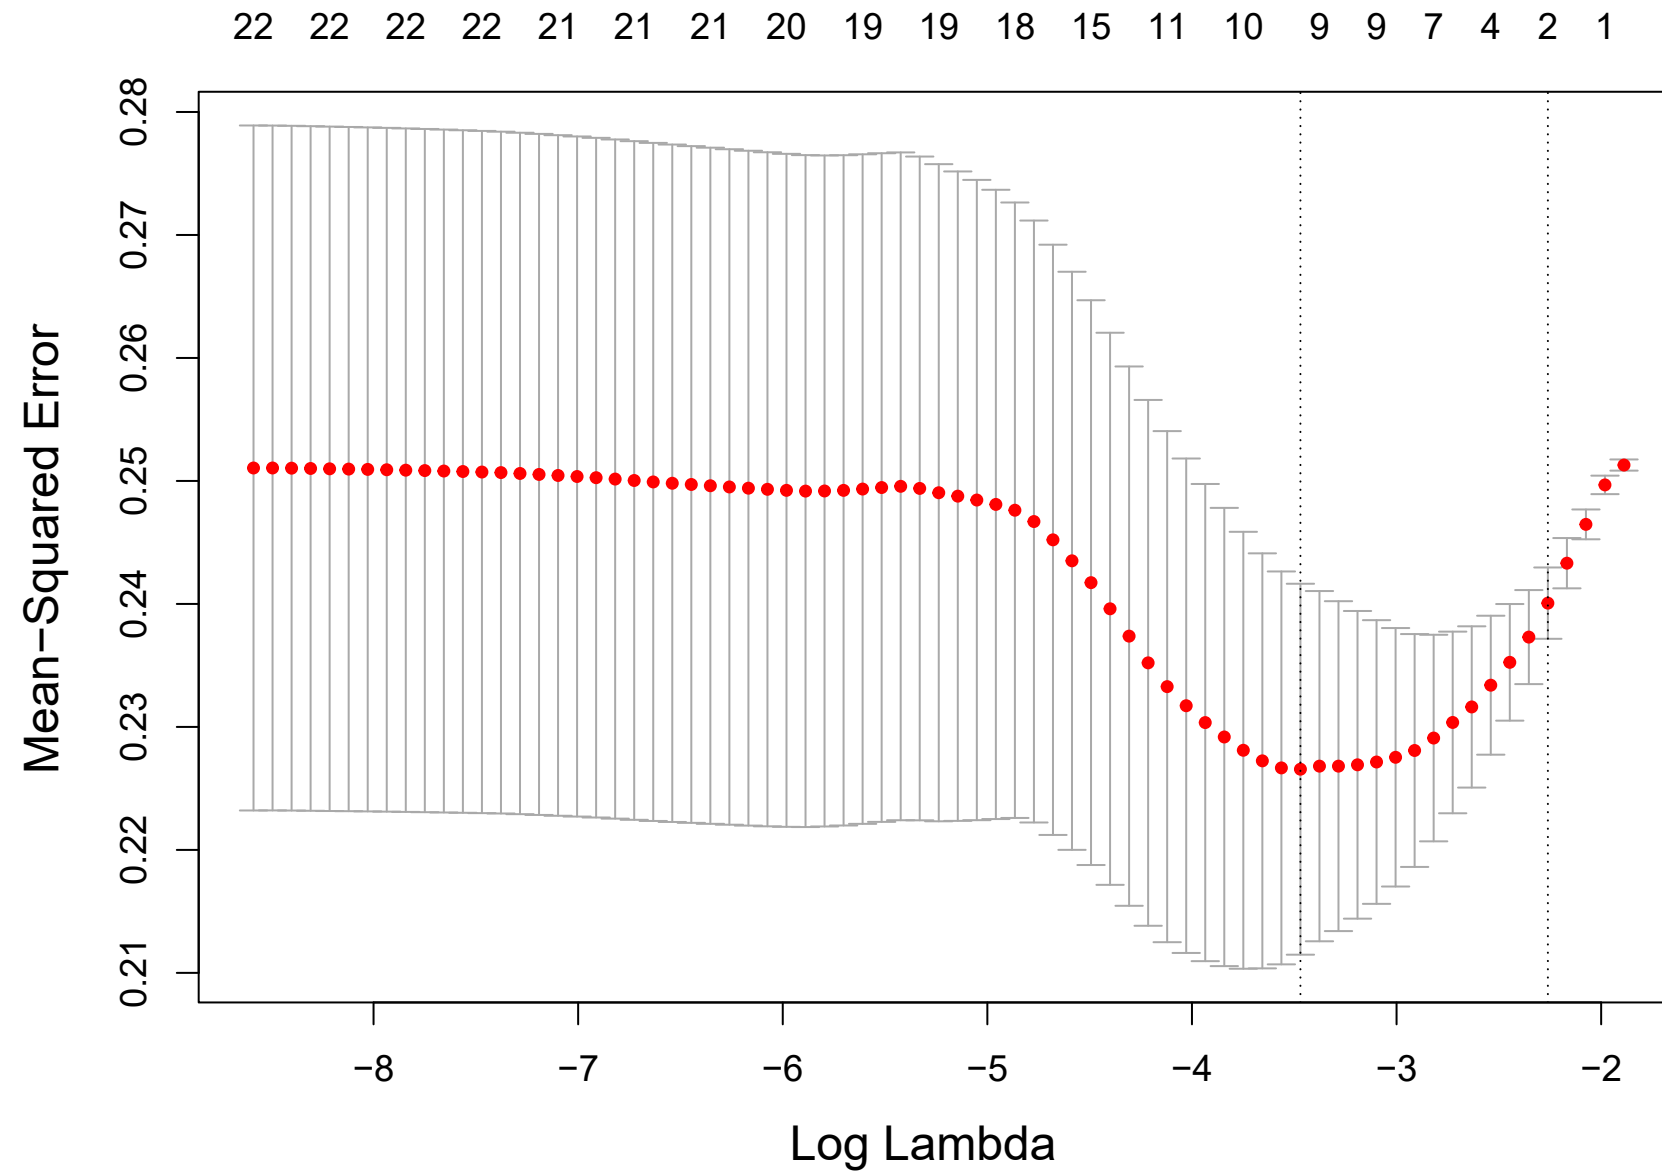

Supplement: supplementary_figure_2.pdf [file supplementary_figure_2.pdf]

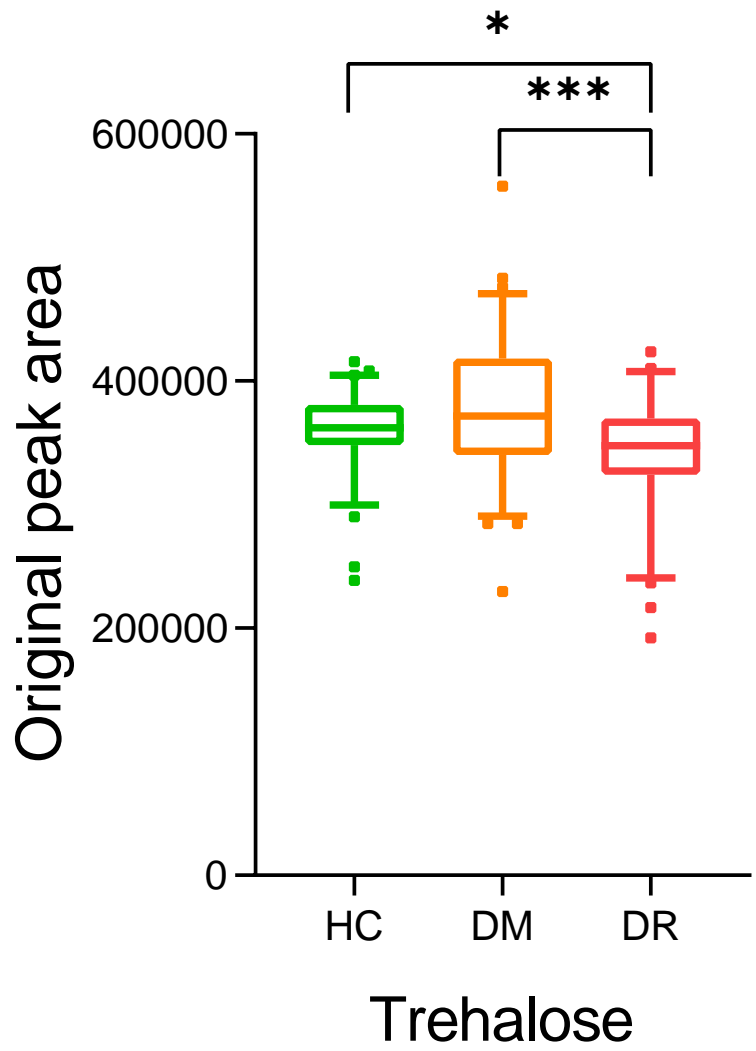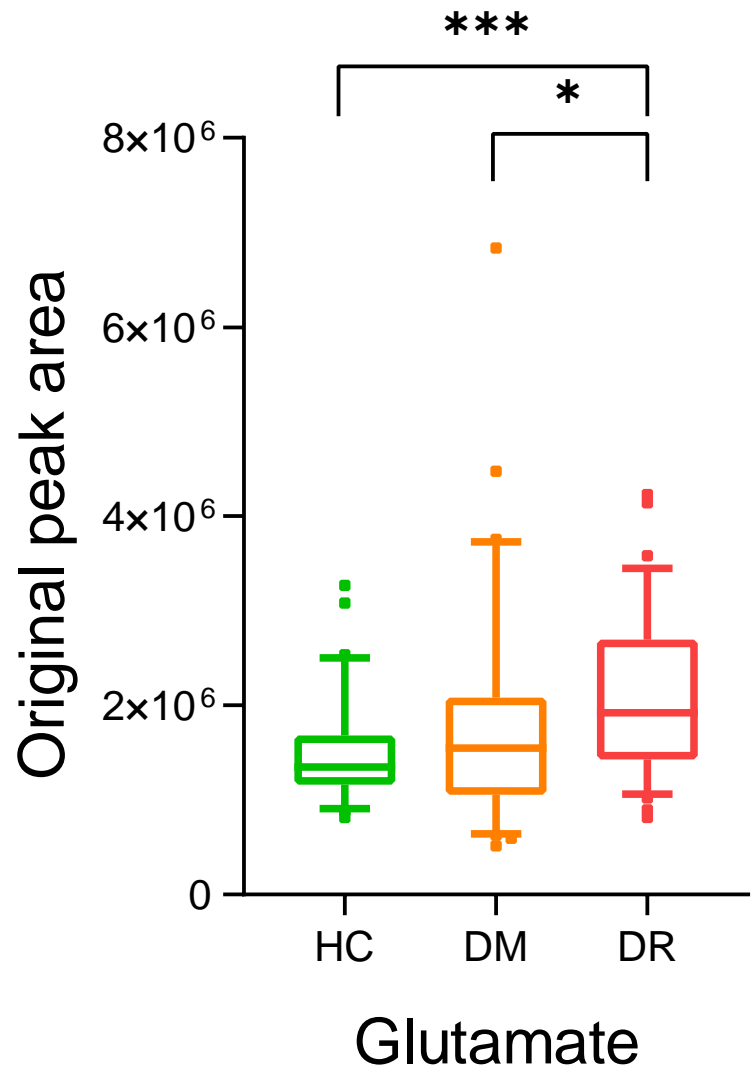

Supplement: supplementary_figure_3.pdf [file supplementary_figure_3.pdf]
